# Supplementary material for: Sociodemographic and Clinical Correlates Associated with the Frequent Service Users in an Italian Psychiatric Emergency Department
Source: MDPI journal article supplement (doi:10.3390/diagnostics13030430), 2023-01-25
Supplement: s1 [file s1]

Table S1a: logistic regression analysis considering only sociodemographic characteristics associated with FSUs

| <b>Model 1</b> | <b>B</b> | <b>S.E.</b> | <b>Wald</b> | <b>p</b> | <b>Exp(B)</b> | <b>95% CI for EXP</b> |
|----------------|----------|-------------|-------------|----------|---------------|-----------------------|
| Current Age    | -0.025   | 0.010       | 6.689       | 0.010    | 0.975         | 0.956-0.994           |
| Single status  | 0.169    | 0.370       | .207        | 0.649    | 1.184         | .573-2.445            |
| Male gender    | -0.269   | .277        | .943        | 0.332    | 0.764         | 0.444-1.316           |
| Constant       | -0.899   | 0.595       | 2.283       | 0.131    | 0.407         |                       |

R<sup>2</sup> Nagelkerke=0.041

Table S1b: logistic regression analysis considering sociodemographic and clinical characteristics associated with FSUs

| <b>Model 2</b>             | <b>B</b> | <b>S.E.</b> | <b>Wald</b> | <b>p</b> | <b>Exp(B)</b> | <b>95% CI for EXP</b> |
|----------------------------|----------|-------------|-------------|----------|---------------|-----------------------|
| Current Age                | 0.012    | 0.013       | 0.909       | 0.340    | 1.012         | 0.987-1.037           |
| Single status              | -0.014   | 0.407       | 0.001       | 0.974    | 0.987         | .444-2.191            |
| Male gender                | -0.408   | 0.327       | 1.555       | 0.212    | 0.665         | 0.350-1.263           |
| Personality disorder       | 0.766    | 0.390       | 3.865       | 0.049    | 2.152         | 1.002-4.620           |
| Substance use disorder     | 0.349    | 0.519       | 0.454       | 0.500    | 1.418         | 0.513-3.921           |
| Age at onset               | -0.050   | 0.018       | 7.631       | 0.006    | 0.951         | 0.918-0.986           |
| Length of hospitalisation  | 0.030    | 0.012       | 5.970       | 0.015    | 1.031         | 1.006-1.056           |
| Non suicidal self-injuries | 0.567    | 0.465       | 1.486       | 0.223    | 1.763         | 0.709-4.385           |
| Psychiatric comorbidity    | 0.086    | 0.360       | 0.058       | 0.810    | 1.090         | 0.538-2.207           |
| Presence of illicit drugs  | 0.067    | 0.487       | 0.019       | 0.890    | 1.069         | 0.412-2.778           |
| Alcohol                    | -0.182   | 0.400       | 0.208       | 0.648    | 0.833         | 0.381-1.824           |
| Cannabinoid                | 0.994    | 0.437       | 5.187       | 0.023    | 2.703         | 1.149-6.362           |
| Cocaine                    | 0.387    | 0.402       | 0.923       | 0.337    | 1.472         | 0.669-3.239           |
| Benzodiazepine therapy     | 0.548    | 0.362       | 2.286       | 0.131    | 1.730         | 0.850-3.520           |
| Other therapy              | 0.524    | 0.345       | 2.299       | 0.129    | 1.688         | 0.858-3.322           |
| Constant                   | -2.557   | 0.858       | 8.890       | 0.003    | 0.078         |                       |

R<sup>2</sup> Nagelkerke=0.224
